# Supplementary material for: An oligonucleotide synthesizer based on a microreactor chip and an inkjet printer
Source: PubMed Central journal article supplement (PMC6434144; doi:10.1038/s41598-019-41519-0), 2019-03-25
Supplement: 41598_2019_41519_MOESM1_ESM.pdf [file 41598_2019_41519_MOESM1_ESM.pdf]

## Supplementary information

### **An oligonucleotide synthesizer based on a microreactor chip and an inkjet printer**

Hui Li<sup>1,5†</sup>, Ye Huang<sup>2,6†</sup>, Zewen Wei<sup>3</sup>, Wei Wang<sup>1</sup>, Zhenjun Yang<sup>2\*</sup>, Zicai Liang<sup>4\*</sup> and Zhihong Li<sup>1\*</sup>

1 Institute of Microelectronics, Peking University, Beijing, China

2 State Key Laboratory of Natural and Biomimetic Drugs, School of Pharmaceutical Sciences, Peking University, Beijing, China

3 National Center for Nanoscience and Technology, Beijing, China

4 Institute of Molecular Medicine, Peking University, Beijing, China

5 Department of Biomedical Engineering, Pennsylvania State University, PA, USA

6 Department of New Drug Research and Development, Institute of Materia Medica, Peking Union Medical College & Chinese Academy of Medical Sciences, Beijing, China.

†Those authors contributed equally to this paper.

\*Corresponding Author: Zhihong Li (Email: zhhli@pku.edu.cn; Tel: +86-10-62766581), Zhenjun Yang (Email: yangzj@bjmu.edu.cn; Tel: 86-10-82802503), or Zicai Liang (Email: Liangz@pku.edu.cn; Tel: 86-10-62769862).

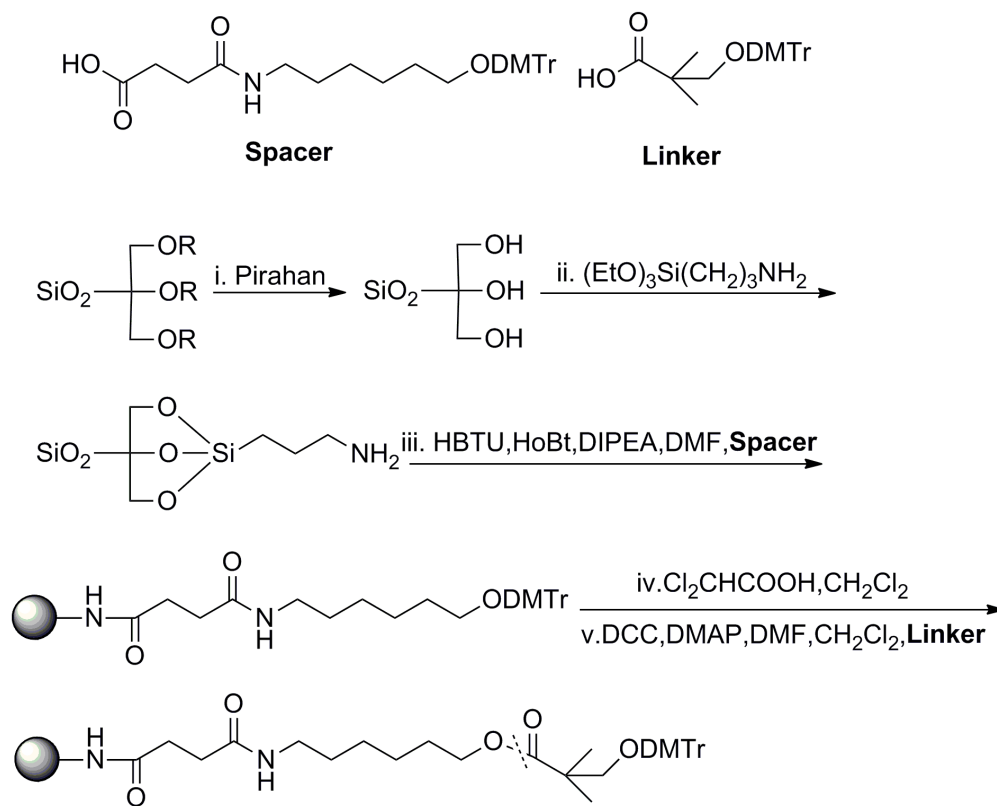

**Fig. S1** Surface treatment of the sintered beads for oligo synthesis.

**Table S1.** The relative oligo amount and synthesis efficiency in each step

| <b>Oligos</b> | <b>Relative amount</b> | <b>Synthesis efficiency</b> |
|---------------|------------------------|-----------------------------|
| Initial       | 65                     | NA                          |
| 1 monomer     | 100                    | 79%                         |
| 2 monomers    | 52                     | 59%                         |
| 3 monomers    | 39                     | 63%                         |
| 4 monomers    | 29                     | 56%                         |
| 5 monomers    | 14                     | 43%                         |
| 6 monomers    | 7.5                    | 35%                         |
